# Supplementary material for: Real-time detection of acetone gas molecules at ppt levels in an air atmosphere using a partially suspended graphene surface acoustic wave skin gas sensor
Source: Royal Society of Chemistry journal article supplement (doi:10.1039/d3na00914a), 2023-01-01

### Supplementary file

## Real-Time Detection of Acetone Gas Molecules at ppt Levels in Air Atmosphere Using a Partially Suspended Graphene Surface Acoustic Wave Skin Gas Sensor

Haolong Zhou<sup>a</sup>, Sankar Ganesh Ramaraj<sup>a, b\*</sup>, Kaijie Ma<sup>b</sup>, Md Shamim Sarker<sup>a</sup>, Zhiqiang Liao<sup>a</sup>,  
Tang Siyi<sup>a</sup>, Hiroyasu Yamahara<sup>a\*</sup>, Hitoshi Tabata<sup>a, b\*</sup>

<sup>a</sup> Department of Electrical Engineering and Information Systems, Graduate School of Engineering, The University of Tokyo, 7-3-1 Hongo, Bunkyo-ku, Tokyo 113-8656, Japan

<sup>b</sup> Department of Bioengineering, Graduate School of Engineering, The University of Tokyo, 7-3-1 Hongo.

Corresponding author email: Hitoshi Tabata: [tabata@g.ecc.u-tokyo.ac.jp](mailto:tabata@g.ecc.u-tokyo.ac.jp); Hiroyasu Yamahara: [yamahara@biooxide.t.u-tokyo.ac.jp](mailto:yamahara@biooxide.t.u-tokyo.ac.jp); Sankar Ganesh Ramaraj: [ramaraj@g.ecc.u-tokyo.ac.jp](mailto:ramaraj@g.ecc.u-tokyo.ac.jp)

Figure S1 (a) Surface roughness of different thickness of SiO<sub>2</sub> film, (b) Grain size of SiO<sub>2</sub> (3 μm) film grown at different temperature.

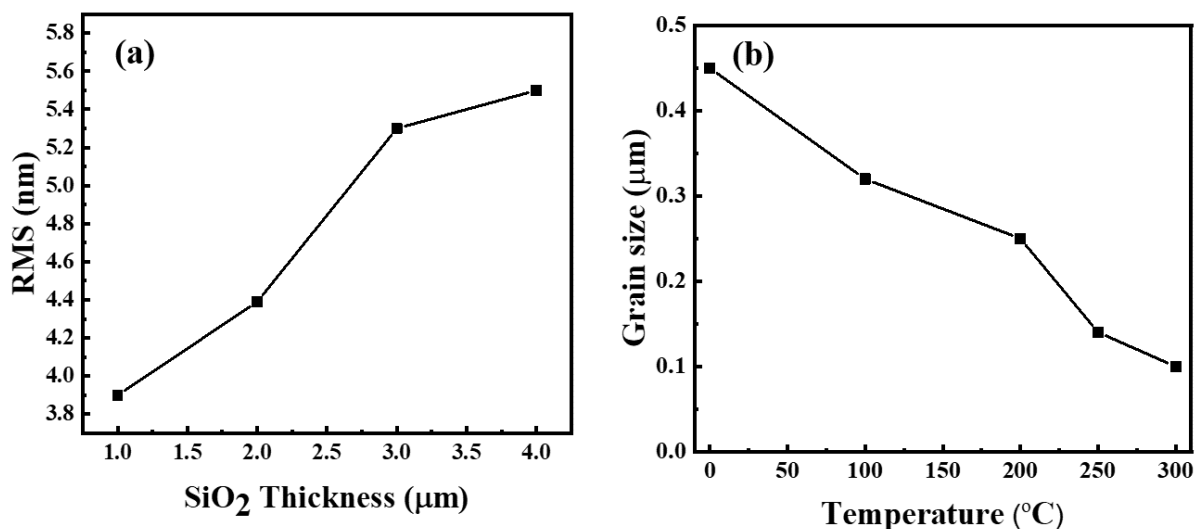



Figure S3 Surface acoustic wave spectra of 1, 2, 3 & 4  $\mu\text{m}$  deposited  $\text{SiO}_2$  thin film.

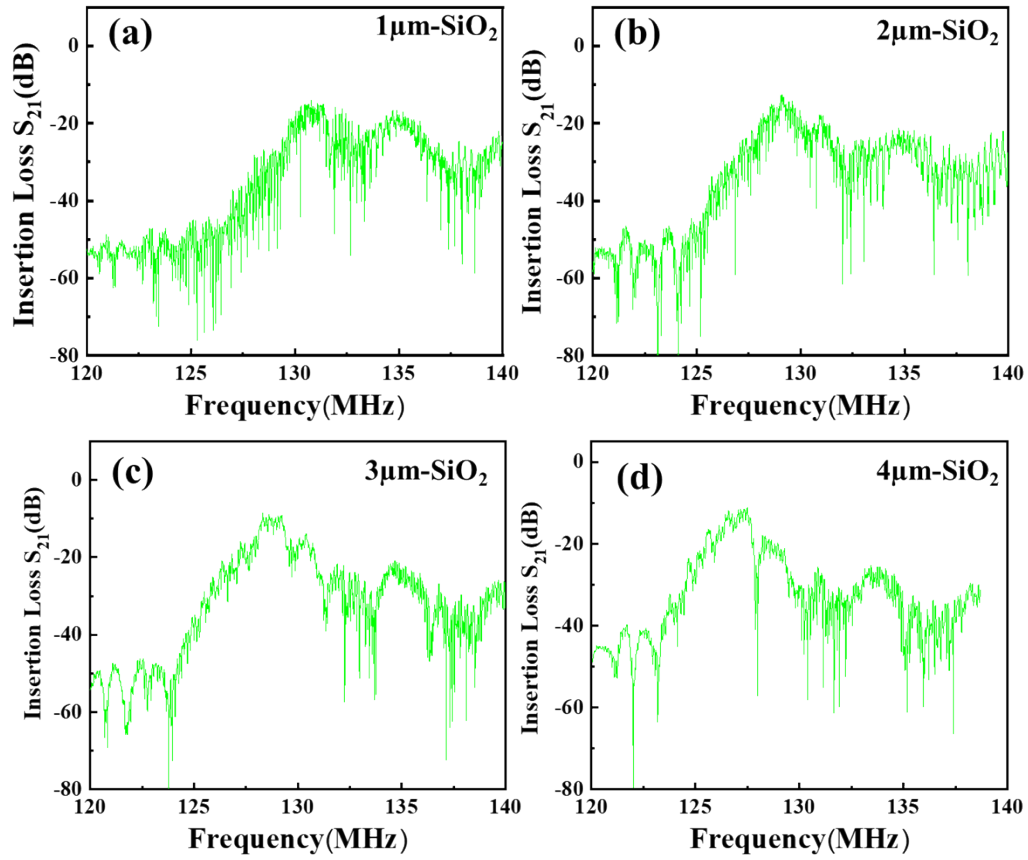

Figure S4 Dynamic frequency response curves of the G-SAW sensor towards (a). acetone, (b). Ammonia, & (c). Ethanol and gas molecules, respectively.

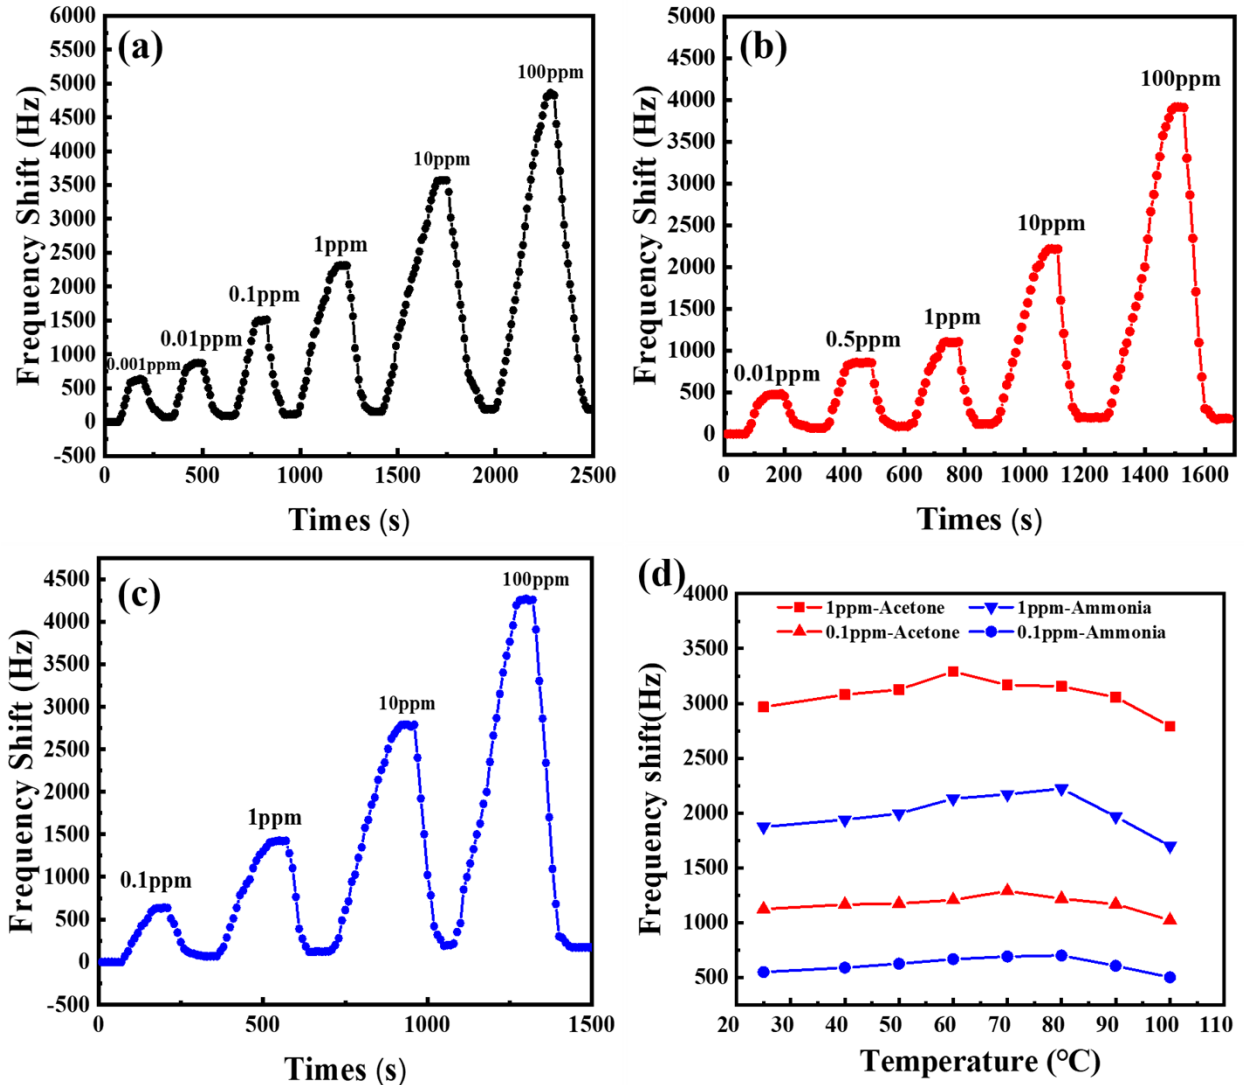

Figure S5. Gas Response of graphene SAW sensor towards acetone under different humidity and temperature.

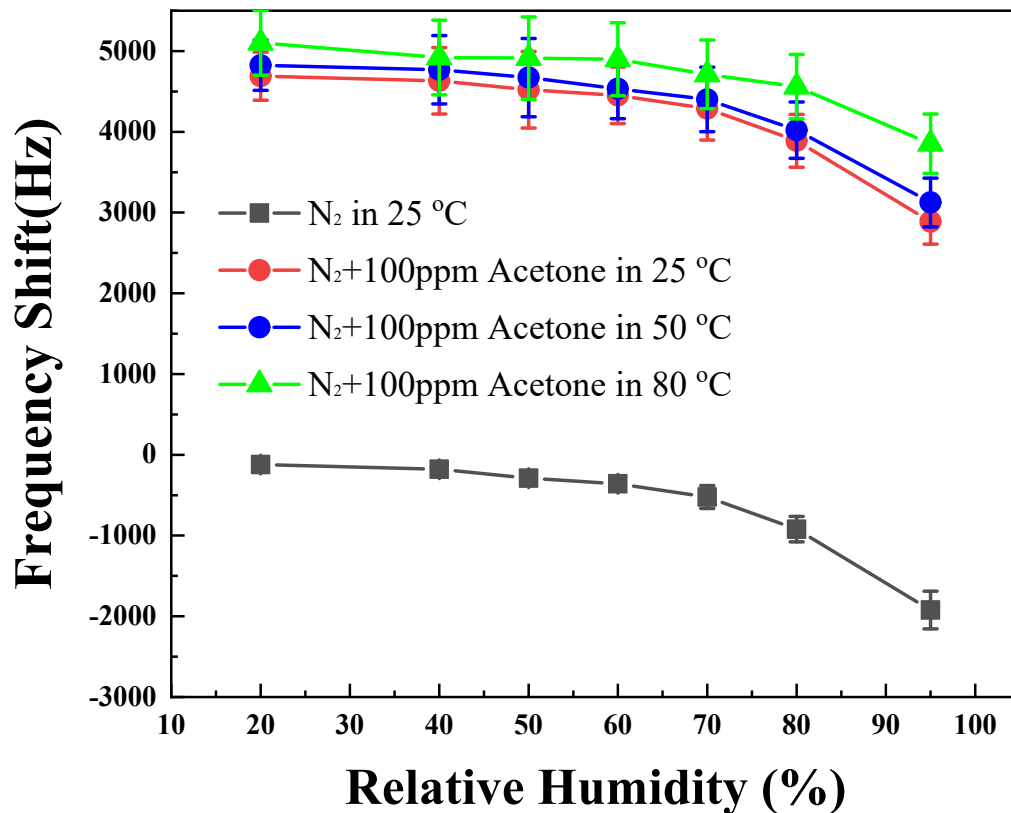

Supplement: d3na00914a1.pdf [file d3na00914a1.pdf]
